# Supplementary material for: Gold-Platinum Nanoparticles with Core-Shell Configuration as Efficient Oxidase-like Nanosensors for Glutathione Detection
Source: MDPI journal article supplement (doi:10.3390/nano12050755), 2022-02-24
Supplement: s1 [file s1]

## SUPPLEMENTARY INFORMATION

### Gold-Platinum Nanoparticles with Core-Shell Configuration as Efficient Oxidase-like Nanosensors for Glutathione Detection

Javier Bonet-Aleta <sup>1,2,3</sup>, Jose I. Garcia-Peiro <sup>1,2,3</sup>, Silvia Irusta <sup>1,2,3</sup> and Jose L. Hueso <sup>1,2,3,\*</sup>

<sup>1</sup> Institute of Nanoscience and Materials of Aragon (INMA), Campus Rio Ebro, CSIC-Universidad de Zaragoza, Edificio I+D, C/Poeta Mariano Esquillor, s/n, 50018 Zaragoza, Spain; jbaleta@unizar.es (J.B.-A.); joseignacio.garcia.peiro@gmail.com (J.I.G.-P.); sirusta@unizar.es (S.I.)

<sup>2</sup> Networking Research Center in Biomaterials, Bioengineering and Nanomedicine (CIBER-BBN), Instituto de Salud Carlos III, 28029 Madrid, Spain

<sup>3</sup> Department of Chemical and Environmental Engineering, Campus Rio Ebro, University of Zaragoza, C/María de Luna, 3, 50018, Zaragoza, Spain

\* Correspondence: jlhueso@unizar.es

#### SUPPLEMENTARY FIGURES

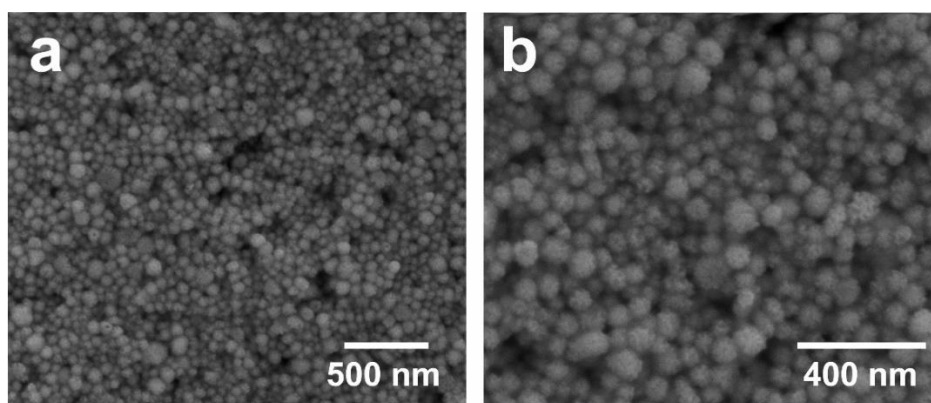

**Figure S1.** Scanning Electron Microscopy (SEM) images of the Au@Pt nanozyme at different magnifications.

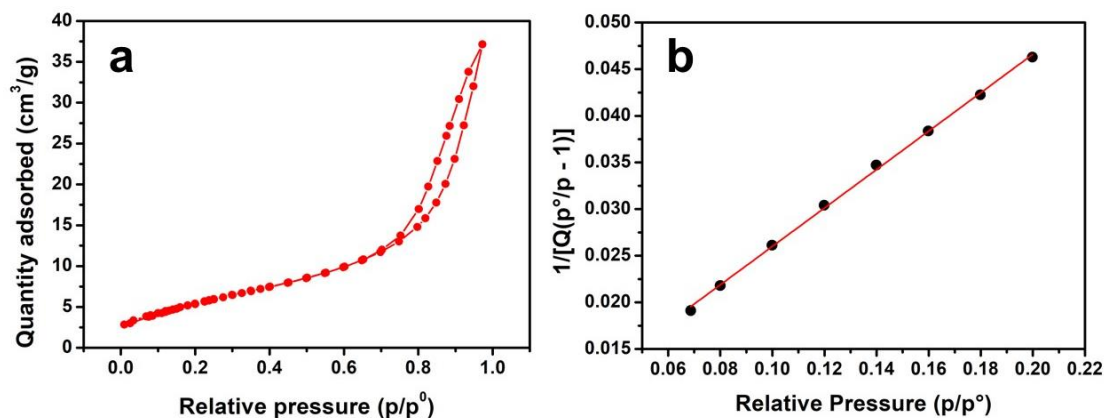

**Figure S2.** (a) N<sub>2</sub> adsorption isotherm at 77 K and (b) Brunauer-Emmett-Teller (BET) analysis of the Au@Pt nanozyme.

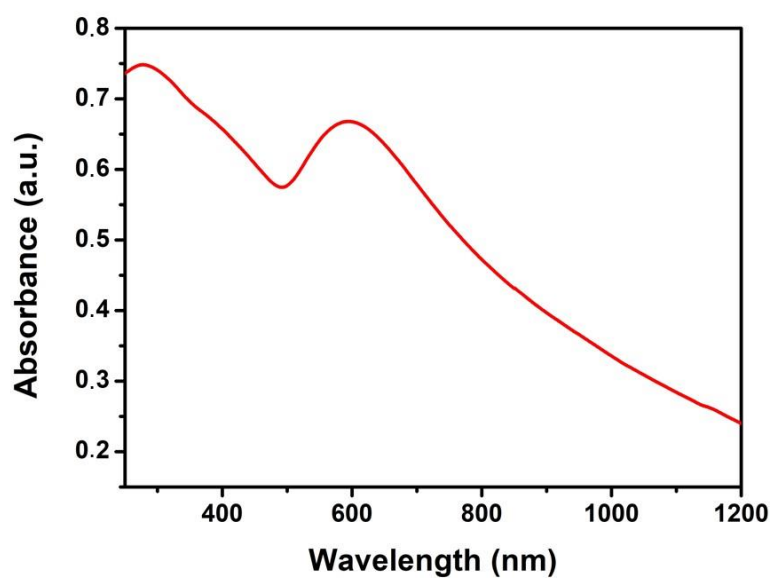

**Figure S3.** UV-vis spectrum of the Au@Pt nanozyme.

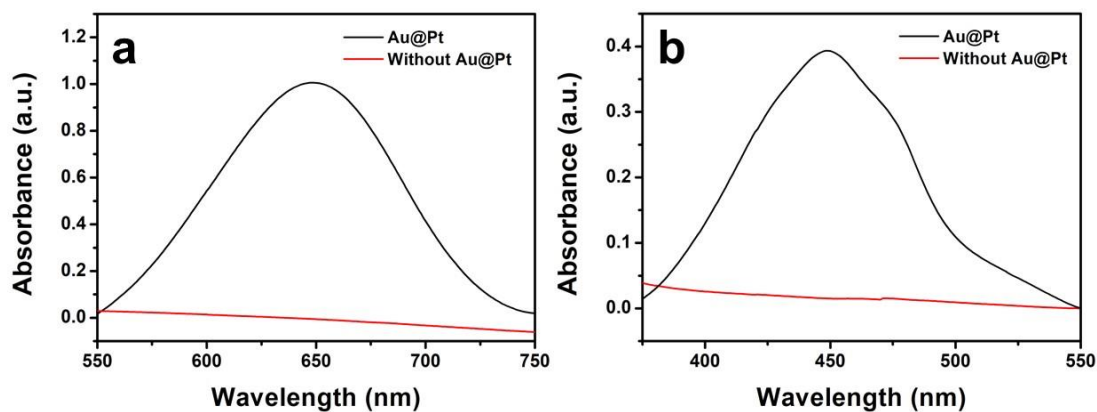

**Figure S4.** UV-vis spectra to evaluate the oxidation of (a) TMB and (b) OPD substrates in the absence (control experiment) and in the presence of the Au@Pt nanozymes; Reaction time in the control experiment was fixed at 1 hour.

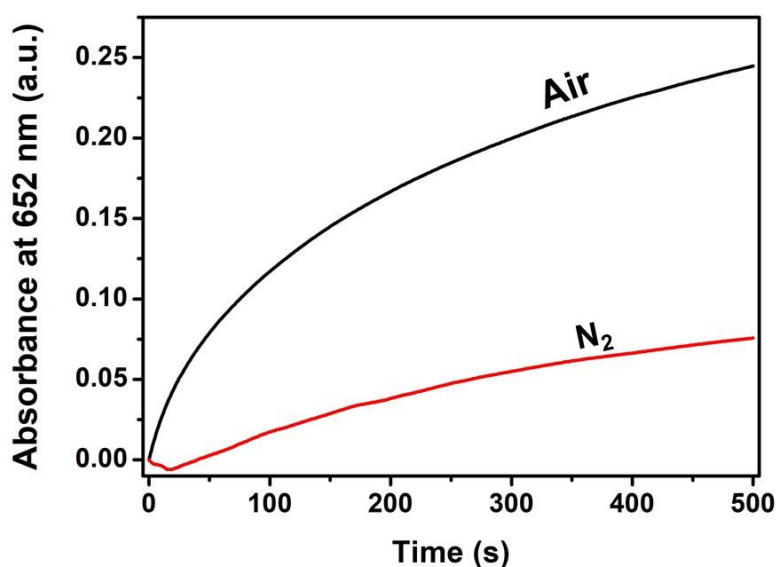

**Figure S5.** Influence of O<sub>2</sub> on the oxidase-like response of the Au@Pt nanozyme versus TMB: Evolution of the maximum absorbance peak at 652 nm at different reaction times in the presence (black line) or absence (red line) of O<sub>2</sub>.

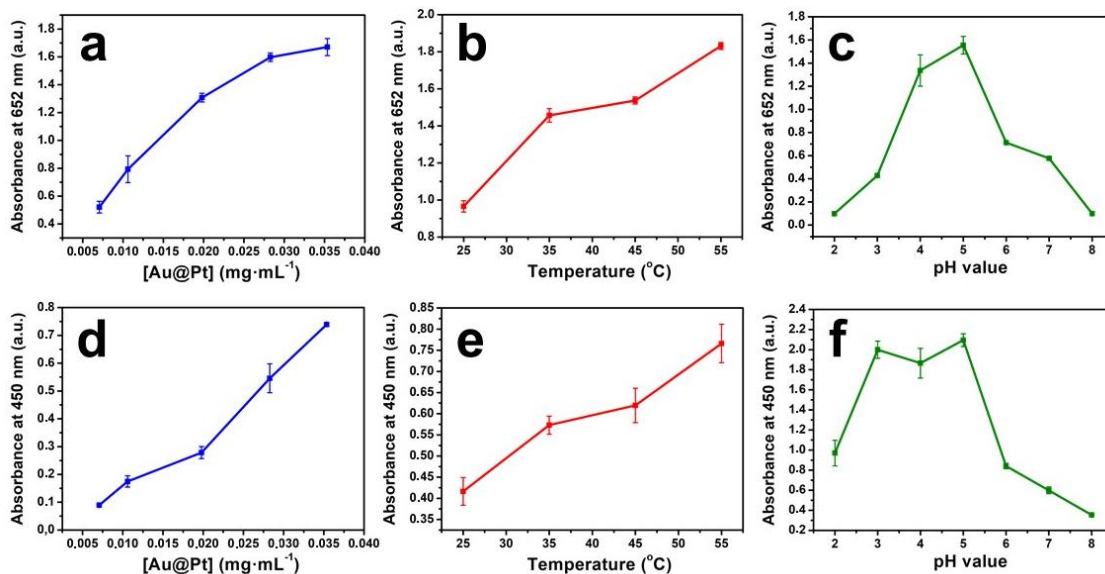

**Figure S6.** Influence of different parameters in the oxidase-like response of the Au@Pt nanozyme: (a,d) Nanozyme concentration; (b,e) temperature; (c,f) and pH for TMB (row from a to c) and OPD (row from d to f); Experimental conditions: Reaction time = 10 minutes. Temperature value for Figure S6<sub>a,c,d,f</sub> = 25 °C; pH for Figure S6<sub>a,b,d,e</sub> = 4.0 (adjusted with CH<sub>3</sub>COOH/CH<sub>3</sub>COONa buffer) and Au@Pt concentration for Figure S6<sub>b,c,e,f</sub> = 0.02 mg×mL<sup>-1</sup>.

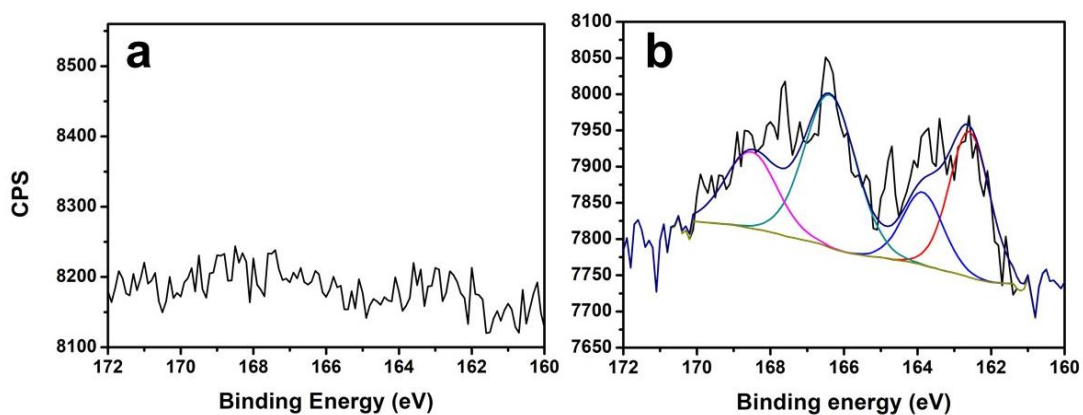

**Figure S7.** X-ray photoemission spectra of the S2p region (a) before and (b) after incubation of Au@Pt with GSH. The atomic percentage of S on the surface increased up to 2.5%.

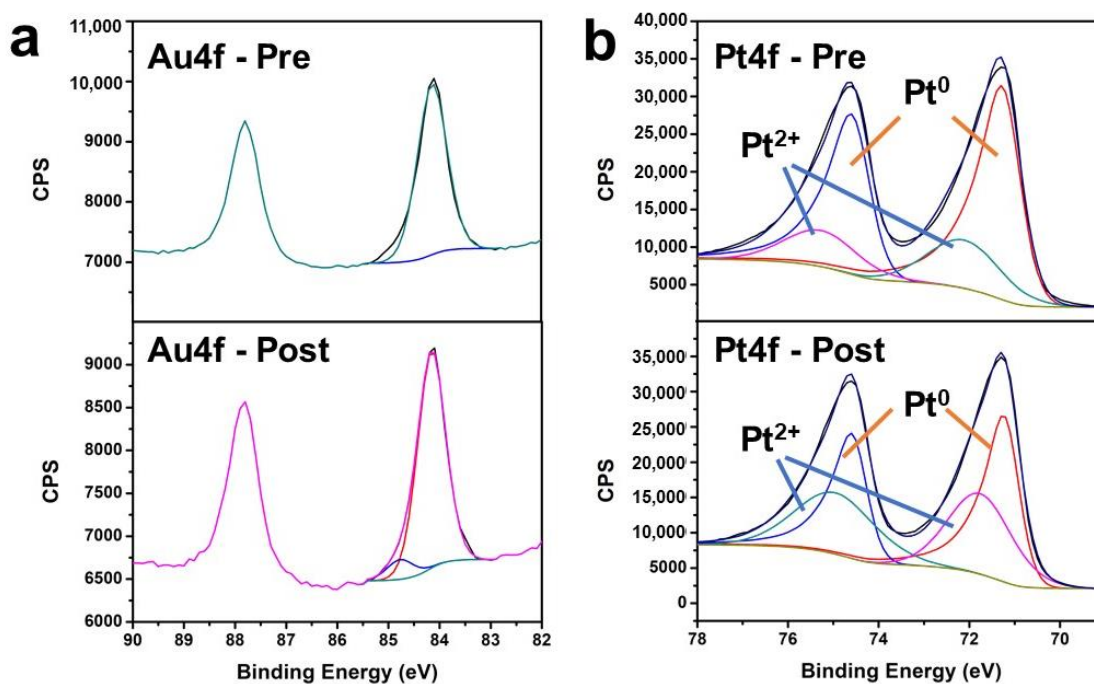

**Figure S8.** X-ray photoemission spectra of the (a) Au4f and (b) Pt4f regions before and after the incubation of Au@Pt nanozyme with GSH.
